# Supplementary material for: PHACTR1 is associated with disease progression in Chinese Moyamoya disease
Source: PeerJ. 2020 May 5;8:e8841. doi: 10.7717/peerj.8841 (PMC7207206; doi:10.7717/peerj.8841)
Supplement: Figure S2 [file peerj-08-8841-s002.xlsx]

## Sheet: Sheet1
	scrambled					siRNA
0 h	1	1.03	0.97	1.14	0.89	0.97	1.08	1.14	0.96	0.86
24 h	0.97	1.02	1.14	0.79	0.98	0.88	1.13	0.98	1.03	0.95
48 h	0.97	0.86	1.04	1.15	0.98	0.97	1.03	0.87	1.05	1.07
72 h	0.89	0.96	0.79	0.87	0.93	0.89	0.85	0.79	0.95	0.93
96 h	0.87	0.79	0.89	0.94	0.78	0.68	0.72	0.69	0.81	0.64
